# Supplementary material for: A statistical model for the analysis of beta values in DNA methylation studies
Source: PubMed Central journal article supplement (PMC5120494; doi:10.1186/s12859-016-1347-4), 2016-11-22
Supplement: 12859_2016_1347_MOESM1_ESM.pdf [file 12859_2016_1347_MOESM1_ESM.pdf]

# A Statistical Model for the Analysis of Beta Values in DNA Methylation Studies

L. Weinhold, S. Wahl, S. Pechlivanis, P. Hoffmann, M. Schmid

## Additional File 1

### 1 Proof of Proposition 1

We start with a lemma on the properties of the modified Bessel function of the first kind of order  $\nu := \alpha - 1$ .

**Lemma 1:** For  $\tilde{\alpha} + \nu > 0$  and  $p > c$  it holds that

$$\int_0^\infty x^{\tilde{\alpha}-1} \exp(-px) I_\nu(cx) dx = p^{-(\tilde{\alpha}+\nu)} \left(\frac{c}{2}\right)^\nu \frac{\Gamma(\nu + \tilde{\alpha})}{\Gamma(\nu + 1)} {}_2F_1\left(\frac{\nu + \tilde{\alpha}}{2}, \frac{\nu + \tilde{\alpha} + 1}{2}, \nu + 1, \frac{c^2}{p^2}\right),$$

where  ${}_2F_1(\cdot)$  is the Gauss hypergeometric function (see [1], p. 350). For a formal proof of Lemma 1, see [2].  $\square$

The proof of Proposition 1 is obtained by deriving the joint density function  $f_{R,b}$  of the random variables  $R := M + U$  and  $b = M/(M + U) = M/R$ . Transforming  $(M, U) = (Rb, R(1 - b))$  into  $(R, b)$  yields the Jacobian matrix

$$\tilde{J} = \begin{pmatrix} \frac{\partial Rb}{\partial R} & \frac{\partial Rb}{\partial b} \\ \frac{\partial R(1-b)}{\partial R} & \frac{\partial R(1-b)}{\partial b} \end{pmatrix} = \begin{pmatrix} b & R \\ (1-b) & -R \end{pmatrix} \quad (1)$$

with  $|\det(\tilde{J})| = R$ . It follows that, under the assumptions of Proposition 1,

$$\begin{aligned} f_{R,b}(r, b) &= \frac{(\lambda_m \lambda_u)^{\frac{\alpha+1}{2}}}{(1-\rho) \rho^{\frac{\alpha-1}{2}} \Gamma(\alpha)} r^\alpha (b(1-b))^{\frac{\alpha-1}{2}} \exp\left(-\frac{\lambda_m r b + \lambda_u r(1-b)}{1-\rho}\right) \\ &\quad \times I_{\alpha-1}\left(\frac{2\sqrt{\rho \lambda_m \lambda_u} r^2 b(1-b)}{1-\rho}\right). \end{aligned} \quad (2)$$

Defining

$$Z(b) := \int r^\alpha \exp\left(-\frac{\lambda_m r b + \lambda_u r(1-b)}{1-\rho}\right) I_{\alpha-1}\left(\frac{2\sqrt{\rho \lambda_m \lambda_u} r^2 b(1-b)}{1-\rho}\right) dr, \quad (3)$$

the marginal density function  $f_b(b)$  is derived by integrating  $f_{R,b}$  over  $R$ :

$$f_b(b) = \int f_{R,b}(r, b) dr = \frac{(\lambda_m \lambda_u)^{\frac{\alpha+1}{2}}}{(1-\rho) \rho^{\frac{\alpha-1}{2}} \Gamma(\alpha)} (b(1-b))^{\frac{\alpha-1}{2}} Z(b). \quad (4)$$

Setting

$$\tilde{\alpha} = \alpha + 1, \quad \nu = \alpha - 1, \quad p = \frac{\lambda_m b + \lambda_u(1-b)}{1-\rho}, \quad c = \frac{2\sqrt{\rho \lambda_m \lambda_u} b(1-b)}{1-\rho} \quad (5)$$

and making use of the fact that

$${}_2F_1(\alpha, \delta, \alpha, x) = (1-x)^{-\delta}, \quad (6)$$

one obtains by application of Lemma 1 that

$$Z(b) = \frac{\Gamma(2\alpha)}{\Gamma(\alpha)} (1-\rho)^{\alpha+1} \frac{\left(\sqrt{\rho \lambda_m \lambda_u} b(1-b)\right)^{\alpha-1}}{(\lambda_m b + \lambda_u(1-b))^{2\alpha}} \left(1 - \frac{4\rho \lambda_m \lambda_u b(1-b)}{(\lambda_m b + \lambda_u(1-b))^2}\right)^{-\frac{2\alpha+1}{2}}. \quad (7)$$

Combining (4) and (7) yields the probability density function stated in Proposition 1.  $\square$

## 2 Proof of Proposition 2

Defining  $\theta := \lambda_m/\lambda_u$ , the log-likelihood function derived from of Equation (9) of the manuscript becomes

$$\begin{aligned}
\sum_{i=1}^n \log(f_b(b_i; \alpha, \rho, \theta)) &= \sum_{i=1}^n \left[ \log(\Gamma(2\alpha)) - 2\log(\Gamma(\alpha)) + \alpha \log(\lambda_m \lambda_u) + \alpha \log(1 - \rho) \right. \\
&\quad + (\alpha - 1) \log(b_i(1 - b_i)) + \log(\lambda_m b_i + \lambda_u(1 - b_i)) \\
&\quad \left. - (\alpha + 0.5) \log((\lambda_m b_i + \lambda_u(1 - b_i))^2 - 4\rho \lambda_m \lambda_u b_i(1 - b_i)) \right] \\
&= \sum_{i=1}^n \left[ \log(\Gamma(2\alpha)) - 2\log(\Gamma(\alpha)) + \alpha \log(\theta \lambda_u^2) + \alpha \log(1 - \rho) \right. \\
&\quad + (\alpha - 1) \log(b_i(1 - b_i)) + \log(\lambda_u((\theta - 1)b_i + 1)) \\
&\quad \left. - (\alpha + 0.5) \log((\lambda_u((\theta - 1)b_i + 1))^2 - 4\rho \theta \lambda_u^2 b_i(1 - b_i)) \right] \\
&= \sum_{i=1}^n \left[ \log(\Gamma(2\alpha)) - 2\log(\Gamma(\alpha)) + \alpha \log(\theta) + \alpha \log(1 - \rho) \right. \\
&\quad + (\alpha - 1) \log(b_i(1 - b_i)) + \log((\theta - 1)b_i + 1) \\
&\quad \left. - (\alpha + 0.5) \log(((\theta - 1)b_i + 1)^2 - 4\rho \theta b_i(1 - b_i)) \right]. \tag{8}
\end{aligned}$$

□

## 3 Derivation of the Observed Information Matrix

Defining  $D_1 := (\exp(\mathbf{X}_i^T \gamma) - 1) b_i + 1$  and  $D_2 := D_1^2 - 4\rho \exp(\mathbf{X}_i^T \gamma) b_i(1 - b_i)$ , the first derivative of Equation (13) of the manuscript w.r.t.  $\gamma$  is given by

$$\begin{aligned}
&\frac{\partial}{\partial \gamma} \sum_{i=1}^n \log(f_b(b_i, \mathbf{X}_i; \alpha, \rho, \gamma)) \\
&= \sum_{i=1}^n \left[ \alpha \mathbf{X}_i^T + \frac{\mathbf{X}_i^T b_i \exp(\mathbf{X}_i^T \gamma)}{D_1} - (\alpha + 0.5) \frac{2(D_1 - 2\rho(1 - b_i)) \mathbf{X}_i^T b_i \exp(\mathbf{X}_i^T \gamma)}{D_2} \right]. \tag{9}
\end{aligned}$$

It follows that the observed information matrix is given by

$$\begin{aligned}
J(\alpha, \rho, \gamma) &= -\frac{\partial^2}{\partial^2 \gamma} \sum_{i=1}^n \log(f_b(b_i, \mathbf{X}_i; \alpha, \rho, \gamma)) \tag{10} \\
&= \sum_{i=1}^n \left[ \frac{(D_1 - b_i \exp(\mathbf{X}_i^T \gamma)) b_i \exp(\mathbf{X}_i^T \gamma) \mathbf{X}_i \mathbf{X}_i^T}{D_1^2} \right. \\
&\quad - (\alpha + 0.5) \frac{2 b_i \exp(\mathbf{X}_i^T \gamma) (D_1 + b_i \exp(\mathbf{X}_i^T \gamma) - 2\rho(1 - b_i)) \mathbf{X}_i \mathbf{X}_i^T}{D_2} \\
&\quad \left. + (\alpha + 0.5) \frac{4 b_i^2 \exp(2\mathbf{X}_i^T \gamma) (D_1 - 2\rho(1 - b_i))^2 \mathbf{X}_i \mathbf{X}_i^T}{D_2^2} \right]. \tag{11}
\end{aligned}$$

## References

- [1] Nadarajah, S., Kotz, S.: Jensen's bivariate gamma distribution: Ratios of components. *Journal of Statistical Computation and Simulation* **77**, 349–358 (2007)
- [2] Prudnikov, A.P., Brychkov, Y.A., Marichev, O.I.: *Integrals and Series*. Gordon and Breach Science Publishers, Amsterdam (1986)
